# Supplementary material for: A “turn-on” chemodosimeter for detection of Cu 2+ in living cells
Source: Royal Society of Chemistry journal article supplement (doi:10.1039/d5dt02331a), 2025-01-01
Supplement: d5dt02331a1.pdf [file d5dt02331a1.pdf]

## **Supporting Information**

### **A “turn-on” chemodosimeter for detection of Cu<sup>2+</sup> in living cells**

Marlies Körber<sup>\*, a</sup>, Dina Attia<sup>a</sup>, Elisabeth Kohlbauer-Masson<sup>a</sup> and Andriy Mokhir <sup>\*, a</sup>

<sup>a</sup> Friedrich-Alexander-University of Erlangen-Nürnberg (FAU), Department of Chemistry and Pharmacy, Organic Chemistry II, 91058  
Erlangen, Germany

\* Corresponding author

Email: [marlies.rippel@fau.de](mailto:marlies.rippel@fau.de); [Andriy.mokhir@fau.de](mailto:Andriy.mokhir@fau.de)

## Table of content

|                                                                      |            |
|----------------------------------------------------------------------|------------|
| <u>Spectra.....</u>                                                  | <u>S3</u>  |
| <u>Log P (octanol-water partition coefficient) .....</u>             | <u>S6</u>  |
| <u>Solubility in aqueous solutions.....</u>                          | <u>S7</u>  |
| <u>Cu<sup>2+</sup> detection in different human cell lines .....</u> | <u>S10</u> |

## Spectra

3ma027466  
Rhhydrazide

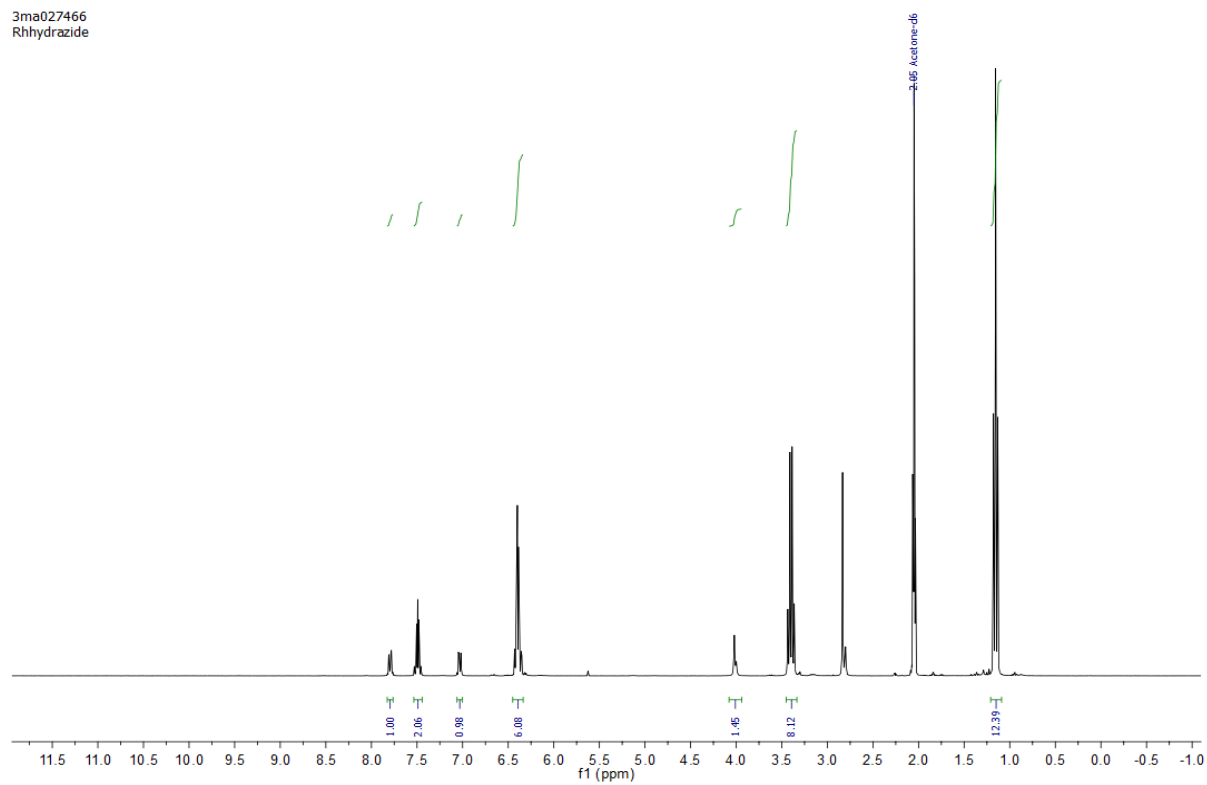

**Figure S1.**  $^1\text{H}$ -NMR spectrum of rhodamine B hydrazide (**HCh**) in acetone- $d_6$ . The signal at 2.6 ppm corresponds to water.

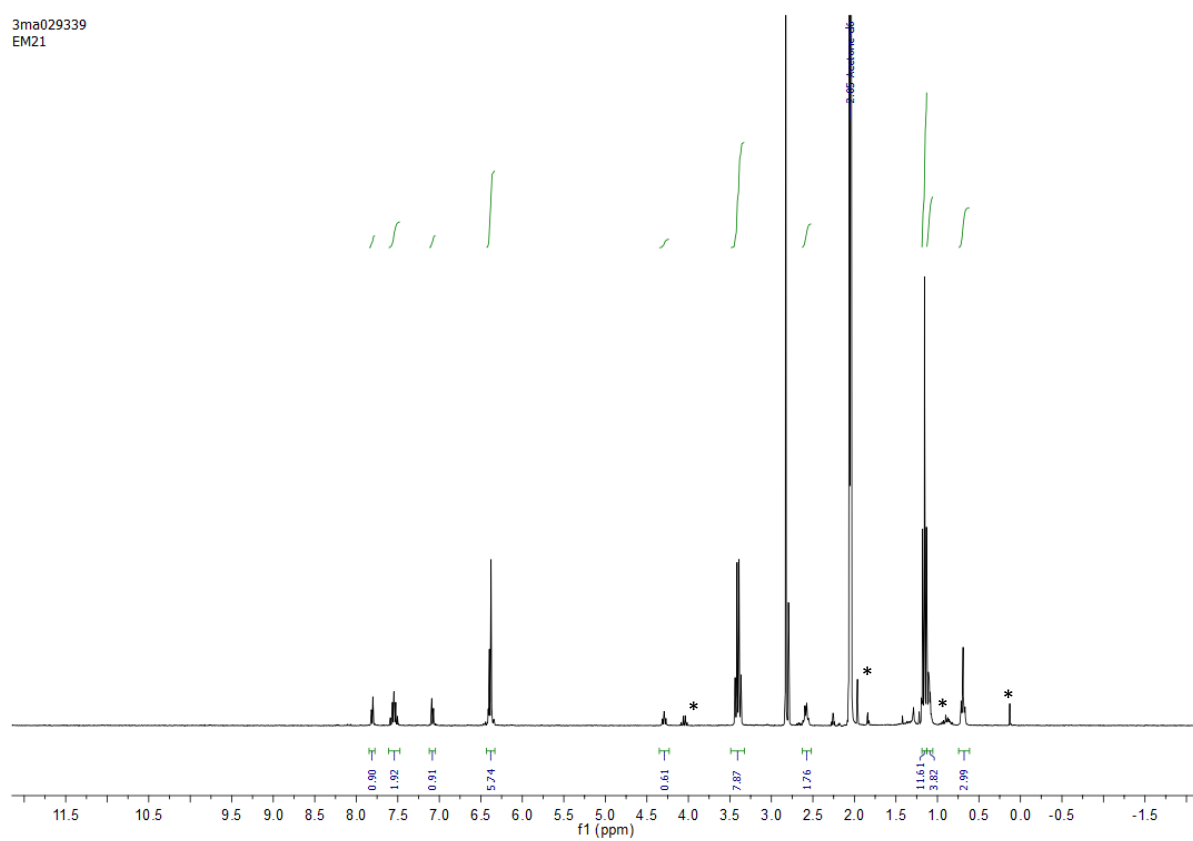

**Figure S2.**  $^1\text{H}$ -NMR spectrum of **BuCh** in acetone- $d_6$ . The signal at 2.6 ppm corresponds to water. The signals indicated as “\*” correspond to ethyl acetate and grease.

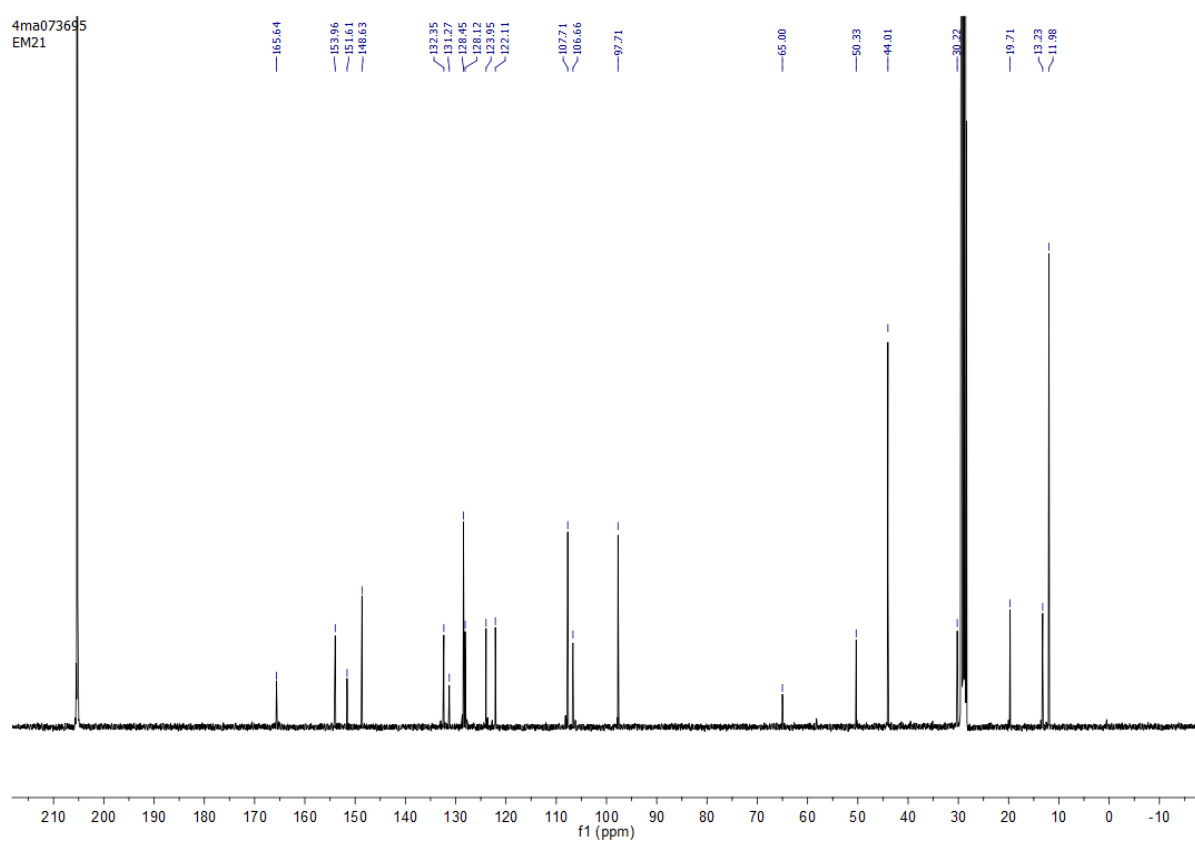

**Figure S3.**  $^{13}\text{C}$ -NMR spectrum of **BuCh** in acetone- $\text{d}_6$ .

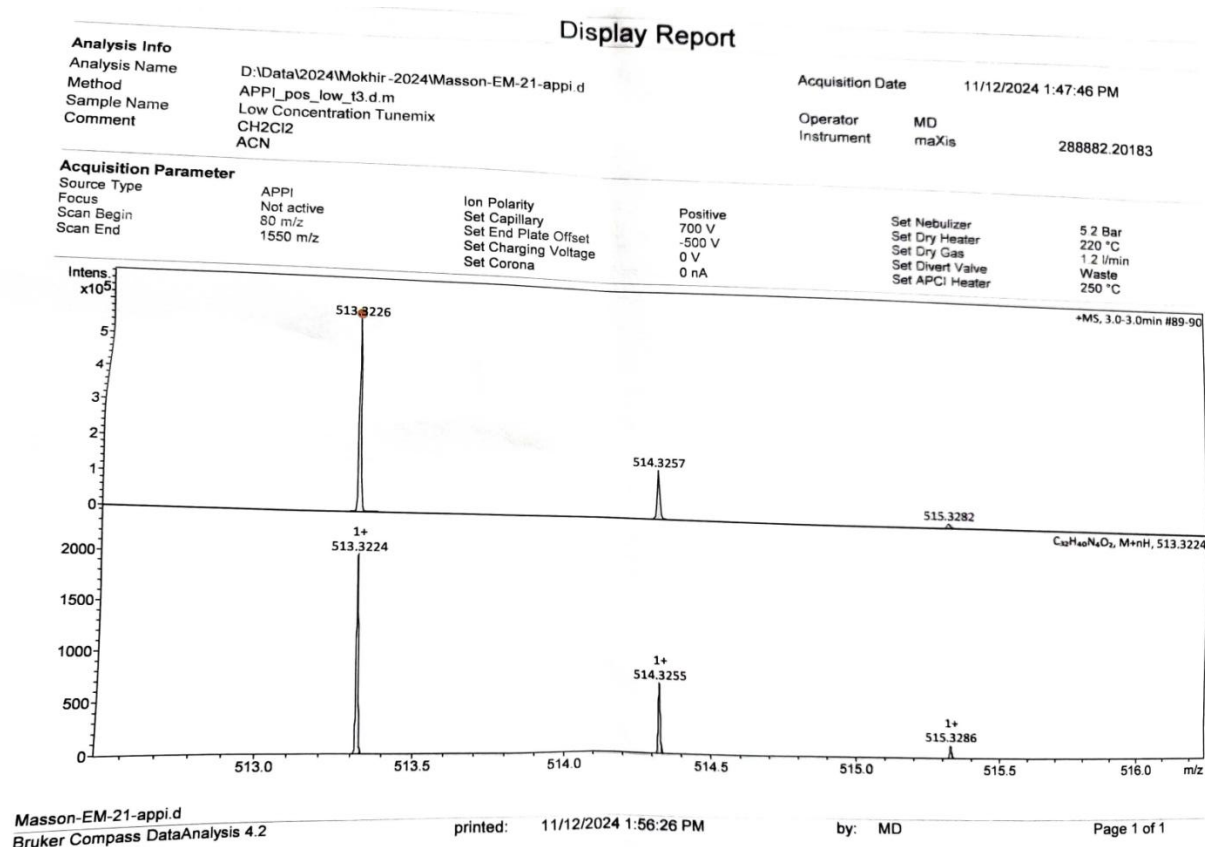

**Figure S4.** Mass spectrum (APPI, pos. mode) of **BuCh**. Lower plot: calculated mass  $m/z$  for  $C_{32}H_{40}N_4O_2$   $[M+H]^+ = 513.3224$ ; upper plot: measured  $m/z$  for  $C_{32}H_{40}N_4O_2$   $[M+H]^+ = 513.3226$ .

#### Log P (octanol-water partition coefficient)

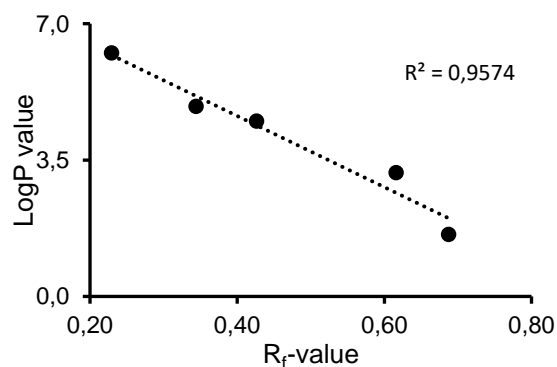

**Figure S5.** shows an example measurement of reference samples with known LogP values against the measured  $R_f$ - values in the eluent system 3-(N-morpholino)propanesulfonic acid (MOPS)/acetonitrile 2/3, v/v.

**Table S1.** shows the measured logP of BuCh and its p-value.

|      | logP $\pm$ p-value |
|------|--------------------|
| BuCh | 6.24 $\pm$ 0.06    |

#### Solubility in aqueous solutions

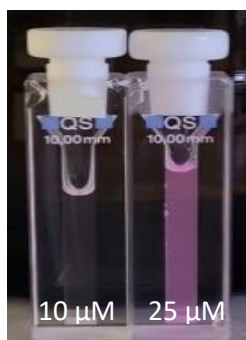

**Figure S6.** shows an image taken of 1ml UV/vis quartz cuvettes containing BuCh (left: 10  $\mu$ M, right: 25  $\mu$ M) in PBS (10 mM, pH 7.4, 1% EtOH, v/v). The observed turbidity in the right cuvette is an indication for a suspension rather than a solution.

**Table S2.** shows the solubility limit of BuCh in aq. solution: PBS (10 mM, pH 7.4) with 1% EtOH (v/v).

|      |                 |
|------|-----------------|
|      | PBS             |
| BuCh | $\leq 20 \mu$ M |

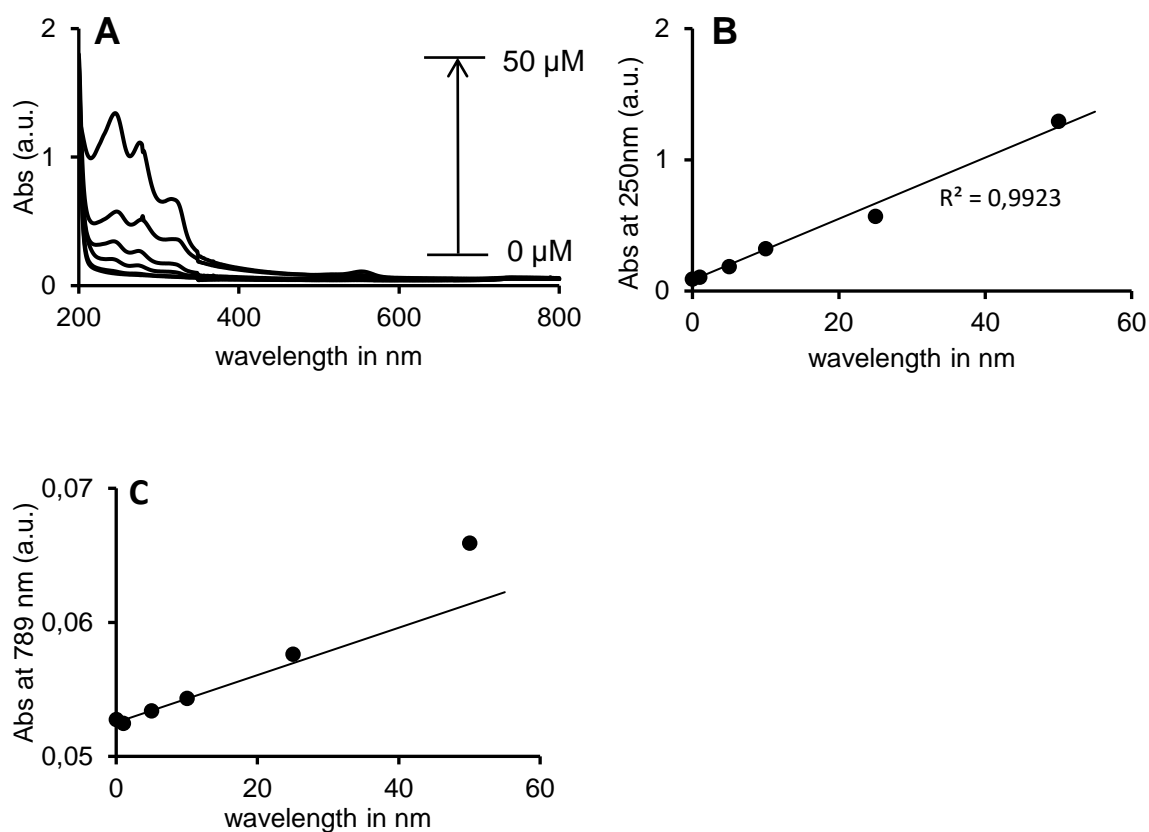

**Figure S7.** A: shows UV/vis spectra of BuCh in increasing concentrations (1, 5, 10, 25, and 50  $\mu\text{M}$ ) in PBS (10 mM, pH 7.4, 1% EtOH, v/v), B: shows the absorbance at 250 nm of the corresponding concentrations of BuCh from the measurement in A and reveals a linear dependence according to Lambert-Beer's law, C: shows the absorbance at 789 nm (baseline) of the increasing BuCh concentrations of A.



## Cu<sup>2+</sup> detection in different human cell lines

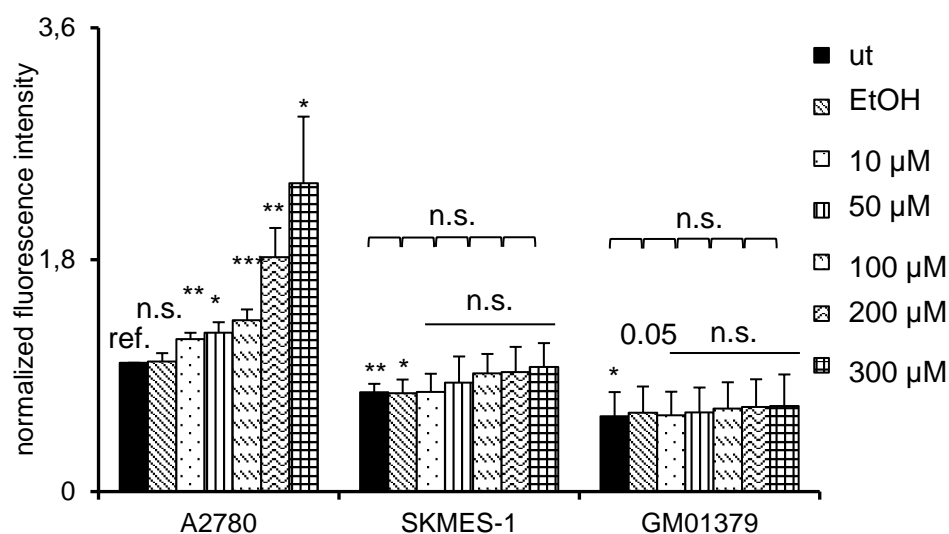

**Figure S8.** Shows the change of fluorescence ( $\lambda_{\text{ex.}} = 488 \text{ nm}$  and  $\lambda_{\text{em.}} = 585 \pm 42 \text{ nm}$ ) of BuCh (20  $\mu\text{M}$ )-loaded cells (A2780 in RPMI 1640 medium, SK-MES-1, and GM01379 both in DMEM medium) that were either untreated (ut.), pre-treated with the carrier ethanol (EtOH, 1%, v/v), or Cu(OAc)<sub>2</sub> (10, 50 100, 200 and 300  $\mu\text{M}$ , 1% EtOH, v/v) for 24 h. Untreated, probe-loaded A2780 cells were used as a reference. Their fluorescence was set to 1. Statistical significance was determined using the Student's t-test, where \* -  $p < 0.05$ , \*\* -  $p < 0.01$ , \*\*\* -  $p < 0.005$  and not significant (n.s.) –  $p \geq 0.05$ .

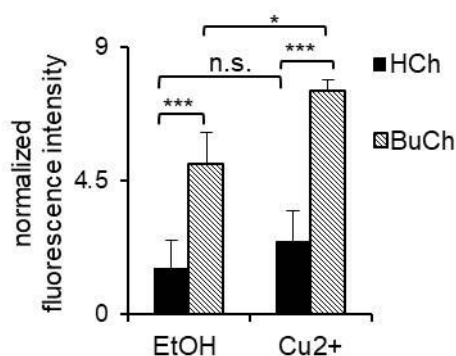

**Figure S9.** shows the change of fluorescence intensity ( $\lambda_{\text{ex.}} = 488 \text{ nm}$  and  $\lambda_{\text{em.}} = 585 \pm 42 \text{ nm}$ ) of BuCh (20  $\mu\text{M}$ )-loaded and HCh (20  $\mu\text{M}$ )-loaded A2780 cells which were either pretreated with ethanol as a carrier (1% EtOH, v/v) or with Cu(OAc)<sub>2</sub> (300  $\mu\text{M}$ , 1% EtOH, v/v) for 24h. Statistical significance was determined using the Student's t-test, where \* -  $p < 0.05$ , \*\*\* -  $p < 0.005$  and not significant (n.s.) –  $p \geq 0.05$ .

## Confocal microscopy experiment

Determination of subcellular distribution:

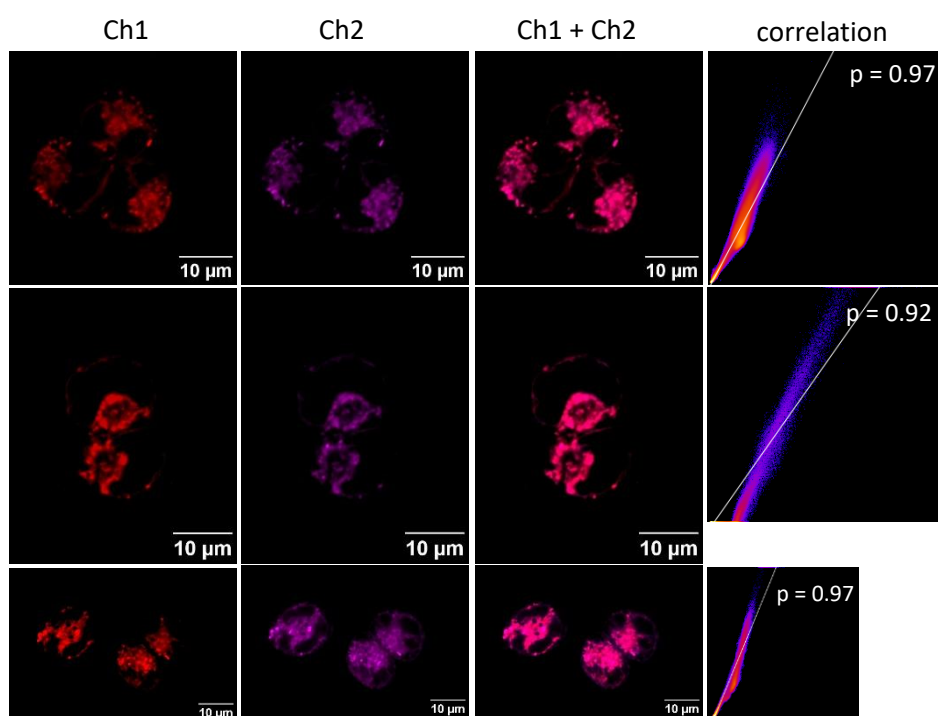

**Figure S10:** shows confocal microscopy images of A2780 cells co-incubated with BuCh (20 μM;  $\lambda_{\text{ex.}} = 561$  nm,  $\lambda_{\text{em.}} = 629 \pm 62$  nm Ch1 (red) channel) and Cy5Azide (10 μM;  $\lambda_{\text{ex.}} = 635$  nm,  $\lambda_{\text{em.}} = 690 \pm 50$  nm, Ch2 (magenta) channel) for 30 min in HBSS (1% EtOH, v/v) and their merged images with the calculated Pearson coefficient  $p$  (correlation).
